# The influence of object-colour knowledge on emerging object representations in the brain

Abbreviated Title: Colour knowledge and object representations

**Lina Teichmann<sup>1,2</sup>, Genevieve L. Quek<sup>5</sup>, Amanda K. Robinson<sup>1,2,3</sup>, Tijl Grootswagers<sup>1,2,3</sup>, Thomas A. Carlson<sup>2,3</sup>, Anina N. Rich<sup>\*1,2,4</sup>**

1I Perception in Action Research Centre & Department of Cognitive Science, Macquarie University, Sydney, Australia

2I ARC Centre of Excellence in Cognition & its Disorders, Macquarie University, Sydney, Australia

3I School of Psychology, University of Sydney, Australia

4I Centre for Elite Performance, Training and Expertise, Macquarie University, Sydney, Australia

5I Donders Institute for Brain, Cognition and Behaviour, Radboud University, Nijmegen, The Netherlands

\*Corresponding author: [anina.rich@mq.edu.au](mailto:anina.rich@mq.edu.au)

CONFLICT OF INTERESTS: none

## ACKNOWLEDGEMENTS:

This research was supported by the Australian Research Council (ARC) Centre of Excellence in Cognition and its Disorders, International Macquarie University Research Training Program Scholarships to LT & TG, an ARC Future Fellowship (FT120100816) and an ARC Discovery project (DP160101300) to TC. ANR has funding from the ARC (DP12102835 and DP170101840). GLQ was supported by a joint initiative between the University of Louvain and the Marie Curie Actions of the European Commission [grant no: F211800012], with additional funding from the European Union's Horizon 2020 research and innovation programme under the Marie Skłodowska-Curie grant agreement No 841909.

The authors acknowledge the University of Sydney HPC service for providing High Performance Computing resources.

## Abstract

1  
2  
3  
4  
5  
6  
7  
8  
9  
10  
11  
12  
13  
14  
15  
16

The ability to rapidly and accurately recognise complex objects is a crucial function of the human visual system. To recognise an object, we need to bind incoming visual features such as colour and form together into cohesive neural representations and integrate these with our pre-existing knowledge about the world. For some objects, typical colour is a central feature for recognition; for example, a banana is typically yellow. Here, we applied multivariate pattern analysis on time-resolved neuroimaging (magnetoencephalography) data to examine how object-colour knowledge affects emerging object representations over time. Our results from 20 participants (11 female) show that the typicality of object-colour combinations influences object representations, although not at the initial stages of object and colour processing. We find evidence that colour decoding peaks later for atypical object-colour combinations in comparison to typical object-colour combinations, illustrating the interplay between processing incoming object features and stored object-knowledge. Taken together, these results provide new insights into the integration of incoming visual information with existing conceptual object knowledge.

17

18

## **Significance Statement**

19 To recognise objects, we have to be able to bind object features such as colour and shape  
20 into one coherent representation and compare it to stored object knowledge. The  
21 magnetoencephalography data presented here provide novel insights about the integration of  
22 incoming visual information with our knowledge about the world. Using colour as a model to  
23 understand the interaction between seeing and knowing, we show that there is a unique  
24 pattern of brain activity for congruently coloured objects (e.g., a yellow banana) relative to  
25 incongruently coloured objects (e.g., a red banana). This effect of object-colour knowledge  
26 only occurs after single object features are processed, demonstrating that conceptual  
27 knowledge is accessed relatively late in the visual processing hierarchy.

28

## Introduction

29 Successful object recognition depends critically on comparing incoming perceptual  
30 information with existing internal representations (Albright, 2012; Clarke & Tyler, 2015). A  
31 central feature of many objects is colour, which can be a highly informative cue in visual object  
32 processing (Rosenthal et al., 2018). Although we know a lot about colour perception itself,  
33 comparatively less is known about how object-colour knowledge interacts with colour  
34 perception and object processing. Here, we measure brain activity with  
35 magnetoencephalography (MEG) and apply multivariate pattern analyses (MVPA) to test how  
36 stored object-colour knowledge influences emerging object representations over time.

37

38 Colour plays a critical role in visual processing by facilitating scene and object recognition  
39 (Gegenfurtner & Rieger, 2000; Tanaka et al., 2001), and by giving an indication of whether an  
40 object is relevant for behaviour (Conway, 2018; Rosenthal et al., 2018). Objects that include  
41 colour as a strong defining feature have been shown to activate representations of associated  
42 colours (Bannert & Bartels, 2013; Hansen et al., 2006; Olkkonen et al., 2008; Teichmann et  
43 al., 2019; Vandenbroucke et al., 2014; Witzel et al., 2011), leading to slower recognition when  
44 there is conflicting colour information (e.g., a red banana; Nagai & Yokosawa, 2003; Tanaka  
45 & Presnell, 1999; for a meta-analysis, see Bramão, Reis, Petersson, & Fásca, 2011).  
46 Neuroimaging studies on humans and non-human primates have shown that there are several  
47 colour-selective regions along the visual ventral pathway (Lafer-Sousa et al., 2016; Lafer-  
48 Sousa & Conway, 2013; Seymour et al., 2010, 2015; Zeki & Marini, 1998). While the more  
49 posterior colour-selective regions do not show a shape bias, the anterior colour-selective  
50 regions do (Lafer-Sousa et al., 2016), supporting suggestions that colour knowledge is  
51 represented in regions associated with higher-level visual processing (Simmons et al., 2007;  
52 Tanaka et al., 2001). A candidate region for the integration of stored knowledge and incoming  
53 visual information is the anterior temporal lobe (ATL; Chiou et al., 2014; Papinutto et al., 2016;  
54 Patterson et al., 2007). In one study (Coutanche & Thompson-Schill, 2014), for example, brain  
55 activation patterns evoked by recalling a known object's colour and its shape could be  
56 distinguished in a subset of brain areas that have been associated with perceiving those  
57 features, namely V4 and lateral occipital cortex, respectively. In contrast, recalling an object's  
58 particular conjunction of colour *and* shape, could only be distinguished in the ATL, suggesting  
59 that the ATL processes conceptual object representations.

60

61 Time-resolved data measured with electroencephalography (EEG) or MEG can give an  
62 understanding of how conceptual-level processing interacts dynamically with perception.



63 Previous EEG studies have examined the temporal dynamics of object-colour knowledge as  
64 an index of the integration of incoming visual information and prior knowledge (Lloyd-Jones et  
65 al., 2012; Lu et al., 2010; Proverbio et al., 2004). For example, Lloyd-Jones et al. (2012)  
66 showed that shape information modulates neural responses at ~170ms (component N1), the  
67 combination of shape and colour affected the signal at 225ms (component P2), and the  
68 typicality of object-colour pairing modulated components approximately 225 and 350ms after  
69 stimulus onset (P2 and P3). These findings suggest that the initial stages of object recognition  
70 may be driven by shape, with the interactions with object-colour knowledge coming into play  
71 at a much later stage, perhaps as late as during response selection.

72  
73 Using multivariate methods for time-resolved neuroimaging data, we can move beyond  
74 averaged measures (i.e., components) to infer what type of information is contained in the  
75 neural signal on a trial-to-trial basis. In the present study, we used MVPA to determine the  
76 timepoint at which neural activity evoked by congruently (e.g., yellow banana) and  
77 incongruently (e.g., red banana) coloured objects differs, which indicates when stored  
78 knowledge is integrated with incoming visual information. Furthermore, we examined whether  
79 existing knowledge about an object's colour influences perceptual processing of surface  
80 colour and object identity. Overall, using colour as a model, our findings elucidate the  
81 timecourse of interactions between incoming visual information and prior knowledge in the  
82 brain.

83  
84

## 85 **Materials and Methods**

### 86 **Participants**

87 20 healthy volunteers (11 female, mean age = 28.9 years, SD = 6.9 years, 1 left-handed)  
88 participated in the study. All participants reported accurate colour-vision and had normal or  
89 corrected-to-normal visual acuity. Participants gave informed consent before the experiment  
90 started and were financially compensated. The study was approved by the Macquarie  
91 University Human Research Ethics Committee.

92

### 93 **Stimuli**

94 We identified five real world objects that previous studies have shown to be strongly  
95 associated with each of four different colours (red, green, orange and yellow; see Figure 1)  
96 (Bannert & Bartels, 2013; Joseph, 1997; Lloyd-Jones et al., 2012; Naor-Raz et al., 2003;  
97 Tanaka & Presnell, 1999; Therriault et al., 2009). Each colour category had one manmade

98 object (e.g., fire hydrant), one living object (e.g., ladybird), and three fruits or vegetables (e.g.,  
99 strawberry, tomato, cherry). We sourced two exemplar images for each object class, resulting  
100 in 10 images for each colour, 40 individual images in total. We then created incongruently  
101 coloured objects by swapping the colours (e.g., yellow strawberry, red banana). For both  
102 congruent and incongruent stimuli, we did not use the native colours from the images  
103 themselves, but instead overlaid pre-specified hues on desaturated (greyscale) images that  
104 were equated for luminance using the SHINE toolbox (Willenbockel et al., 2010). A greyscale  
105 image overlaid with its canonically associated colour (e.g., yellow hue applied to greyscale  
106 banana) resulted in a congruent object; a greyscale image overlaid with a colour different  
107 from its canonically associated colour (e.g., red hue applied to greyscale banana) resulted in  
108 an incongruent object. Every congruent object exemplar had a single colour-matched  
109 incongruent partner. For example, we used a specific shade of red and added it to the grey-  
110 scale images of the strawberry to make the congruent strawberry and overlaid it onto the  
111 lemon to make the incongruent lemon. We then took a specific shade of yellow and overlaid  
112 it on the lemons to make the congruent lemon exemplar, and onto the strawberry to make the  
113 incongruent strawberry exemplar. That means, overall, we have the identical objects and  
114 colours in the congruent and the incongruent condition, a factor that is crucial to ensure our  
115 results cannot be explained by features other than colour congruency. The only difference  
116 between these key conditions is that the colour-object combination is either typical (congruent)  
117 or atypical (incongruent).

118  
119 This procedure resulted in 40 congruent objects (10 of each colour), and 40 incongruent  
120 objects (10 of each colour, Figure 1). We added two additional stimulus types to this set: the  
121 full set of 40 greyscale images, and a set of 10 different angular abstract shapes, coloured in  
122 each of the four hues for a set of 40 (see Figure 1). As is clear in Figure 1, the colours of the  
123 abstract shapes appeared brighter than the colours of the objects, this is because the latter  
124 were made by overlaying hue on greyscale, whereas the shapes were simply coloured. As  
125 our principle goal was to ensure that the congruent objects appeared to have their typical  
126 colouring, we did not match the overall luminance of the coloured stimuli. For example, if we  
127 equated the red of a cherry with the yellow of a lemon, neither object would look typically  
128 coloured. Thus, each specific colour pair is not equated for luminance; however, we have the  
129 same colours across different conditions.

130

131 All stimuli were presented at a distance of 114cm. To add visual variability, which reduces the  
132 low-level featural overlap between the images, we varied the image size from trial to trial by 2  
133 degrees of visual angle. The range of visual angles was therefore between ~4.3 – 6.3 degrees.

134

## 135 **Experimental Design and Statistical Analysis**

### 136 *Experimental tasks*

137 In the main task (Figure 1C), participants completed eight blocks of 800 stimulus presentations  
138 each. Each individual stimulus appeared 40 times over the course of the experiment. Each  
139 stimulus was presented centrally for 450ms with a black fixation dot on top of it. To keep  
140 participants attentive, after every 80 stimulus presentations, a target image was presented  
141 until a response was given indicating whether this stimulus had appeared in the last 80  
142 stimulus presentations or not (50% present vs absent). The different conditions (congruent,  
143 incongruent, grey-scale, abstract shape) were randomly intermingled throughout each block,  
144 and the target was randomly selected each time. On average, participants performed with  
145 90% (SD=5.4%) accuracy.

146

147 After completing the main blocks, we collected behavioural object-naming data to test for a  
148 behavioural congruency effect with our stimuli. On the screen, participants saw each of the  
149 objects again (congruent, incongruent or greyscale) in a random order and were asked to  
150 name the objects as quickly as possible. As soon as voice onset was detected, the stimulus  
151 disappeared. We marked stimulus-presentation times with a photodiode and recorded voice-  
152 onset with a microphone. Seventeen participants completed three blocks of this reaction time  
153 task, one participant completed two blocks, and for two participants we could not record any  
154 reaction times. Each block contained all congruent, incongruent and grey-scale objects  
155 presented once.

156

157 Naming reaction times were defined as the difference between stimulus-onset and voice-  
158 onset. Trials containing naming errors and microphone errors were not analysed. We  
159 calculated the median naming time for each exemplar for each person and then averaged the  
160 naming times for each of the congruent, incongruent and greyscale conditions.

161

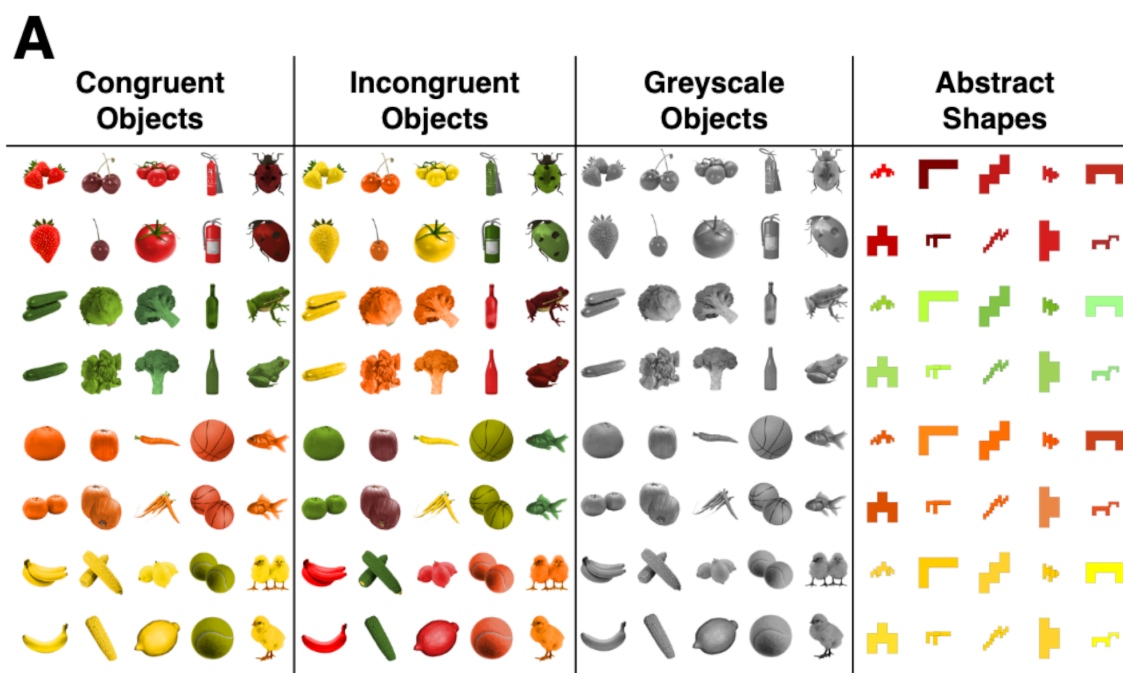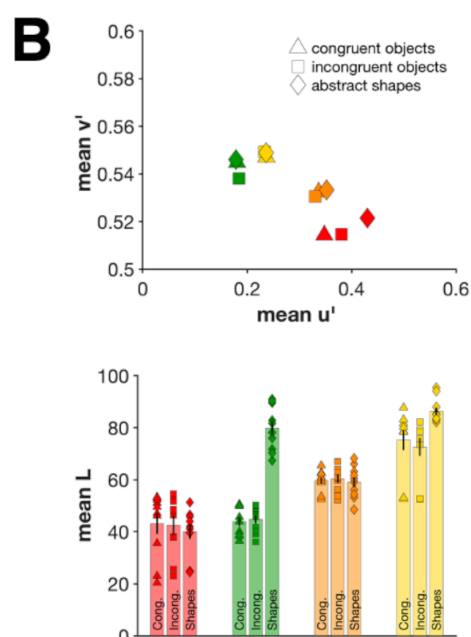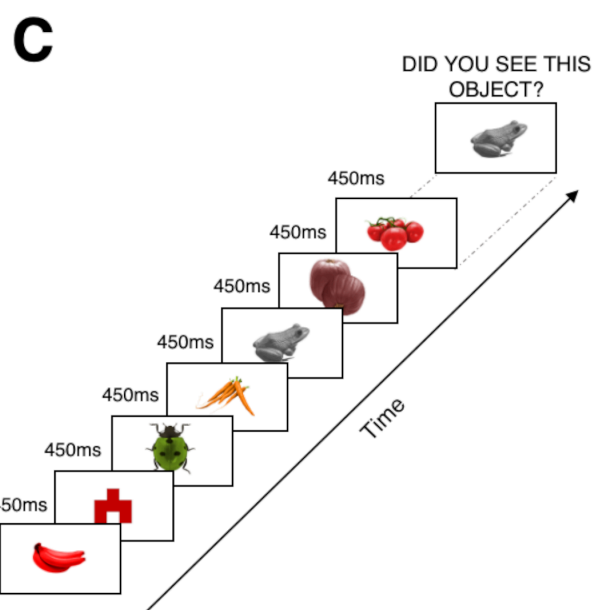

162 Figure 1. (A) shows all stimuli used in this experiment. The same objects were used in the  
 163 congruent, incongruent, and greyscale conditions. There were two exemplars of each object.  
 164 Colours in the congruent and incongruent condition were matched. The abstract shapes were  
 165 identical across colour categories. (B) shows the mean chromaticity coordinates for the 2°  
 166 observer under D65 illumination for each colour category (top) as well as the mean lightness  
 167 of all coloured stimuli used in this experiment (bottom). The colours were transformed into  
 168 CIELUV space using the OptProp toolbox (Wagberg, 2007). (C) shows an example sequence  
 169 of the main task. Participants viewed each object for 450ms. After each sequence, one object  
 170 was displayed and participants had to indicate whether they had seen this object in the  
 171 previous sequence or not.

172  
 173  
 174

175

176

### 177 *MEG data acquisition*

178 While participants completed the main task of the experiment, neuromagnetic recordings were  
179 conducted with a whole-head axial gradiometer MEG (KIT, Kanazawa, Japan), containing 160  
180 axial gradiometers. We recorded the MEG signal with a 1000Hz frequency. An online low-  
181 pass filter of 200Hz and a high-pass filter of 0.03Hz were used. All stimuli were projected on  
182 a translucent screen mounted on the ceiling of the magnetically shielded room. Stimuli were  
183 presented using MATLAB with Psychtoolbox extension (Brainard, 1997; Brainard & Pelli,  
184 1997; Kleiner et al., 2007). Parallel port triggers and the signal of a photodiode were used to  
185 mark the beginning and end of each trial. A Bimanual 4-Button Fiber Optic Response Pad  
186 (Current Designs, Philadelphia, USA) was used to record the responses.

187

188 Before entering the magnetically shielded room for MEG recordings, an elastic cap with five  
189 marker coils was placed on the participant's head. We recorded head shape with a Polhemus  
190 Fastrak digitiser pen (Colchester, USA) and used the marker coils to measure the head  
191 position within the magnetically shielded room at the start of the experiment, halfway through  
192 and at the end.

193

### 194 *MEG data analysis: Preprocessing*

195 FieldTrip (Oostenveld et al., 2011) was used to preprocess the MEG data. The data were  
196 downsampled to 200Hz and then epoched from -100 to 500ms relative to stimulus onset. We  
197 did not conduct any further preprocessing steps (filtering, channel selection, trial-averaging  
198 etc.) to keep the data in its rawest possible form.

199

### 200 *MEG data analysis: Decoding Analyses*

201 For all our decoding analyses, patterns of brain activity were extracted across all 160 MEG  
202 sensors at every timepoint, for each participant separately. We used a regularised linear  
203 discriminant analysis (LDA) classifier which was trained to distinguish the conditions of interest  
204 across the 160-dimensional space. We then used independent test data to assess whether  
205 the classifier could predict the condition above chance in the new data. We conducted training  
206 and testing at every timepoint and tested for significance using random-effects Monte Carlo  
207 cluster (TFCE; Smith & Nichols, 2009) statistics, corrected for multiple comparisons using the  
208 max statistic across time points (Maris & Oostenveld, 2007). Note that our aim was not to  
209 achieve the highest possible decoding accuracy, but rather to test whether the classifier could

210 predict the conditions above chance at any of the timepoints (i.e., “classification for  
211 interpretation”, Hebart & Baker, 2017). Therefore, we followed a minimal preprocessing  
212 pipeline and performed our analyses on a single-trial basis. Classification accuracy above  
213 chance indicates that the MEG data contains information that is different for the categories.  
214 We used the CoSMoMVPA toolbox (Oosterhof et al., 2016) to conduct all our analyses.

215  
216 We ran several decoding analyses which can be divided in three broad themes. First, we  
217 tested when we can differentiate between trials where congruently and incongruently coloured  
218 objects were presented. This gives us an indication of the timecourse of the integration of  
219 visual object representations and stored conceptual knowledge. Second, we examined single  
220 feature processing focusing on colour processing and how the typicality of object-colour  
221 combinations influences colour processing over time. Third, we looked at another single  
222 feature, shape, and tested whether object-colour combinations influence shape processing  
223 over time.

224  
225 For the congruency analysis (Figure 2A), we tested whether activation patterns evoked by  
226 congruently coloured objects (e.g., red strawberry) differ from activation patterns evoked by  
227 incongruently coloured objects (e.g., yellow strawberry). Any differential response that  
228 depends on whether a colour is typical or atypical for an object (a congruency effect) requires  
229 the perceived shape and colour to be bound and compared to a conceptual object  
230 representation activated from memory. We trained the classifier on all congruent and  
231 incongruent trials *except* for trials corresponding to one pair of matched exemplars (e.g., all  
232 instances of congruent and incongruent strawberries and congruent and incongruent  
233 bananas). We then tested the classifier using only the left-out exemplar pairs. We repeated  
234 this process until each matched exemplar pair had been left out (i.e., used as test data) once.  
235 Leaving an exemplar pair out ensures that there are identical objects and colours for both  
236 classes (congruent and incongruent) in both the training and the testing set, and that the  
237 stimuli of the test set have different shape characteristics than any of the training objects. As  
238 such, the only distinguishing feature between the conditions is the *conjunction* of shape and  
239 colour features, which defines congruency. This allows us to compare directly whether (and  
240 at which timepoint) stored object representations interacts with incoming object-colour  
241 information.

242  
243 Next, we focused on the timecourse of colour processing. First, we examined the timecourse  
244 of colour processing independent of congruency (Figure 3A). For this analysis, we trained the



245 classifier on distinguishing between the four different colour categories of the abstract shapes  
246 and tested its performance on an independent set of abstract shape trials. We always left one  
247 block out for the cross-validation (8-folds). The results of this analysis give an indication about  
248 the emergence of when the representations differ between different surface colours, but as  
249 we did not control the colours to be equal in luminance or have the same hue difference  
250 between each pair, this is not a pure chromatic measure. We did not control luminance  
251 because we used these colours to create our coloured objects, which needed to look as  
252 realistic as possible. Thus, the colour decoding analysis includes large and small differences  
253 in hue *and in luminance* between the categories. To look at the differences between each  
254 colour pair, we also present confusion matrices showing the frequencies of the predicted  
255 colour categories at peak decoding.

256  
257 Our second colour processing analysis was to examine whether the conjunction of object and  
258 colour influenced colour processing (Figure 4A). Perceiving a strongly associated object in the  
259 context of viewing a certain colour might lead to a more stable representation of that colour in  
260 the MEG signal. For example, if we see a yellow banana, the banana shape may facilitate a  
261 representation of the colour yellow earlier than if we see a yellow strawberry. To assess this  
262 possibility, we trained the classifier to distinguish between the surface colours of the abstract  
263 shapes (i.e., red, orange, yellow, green; chance: 25%). We then tested how well the classifier  
264 could predict the colour of the congruent and incongruent objects. Training the classifier on  
265 the same abstract shapes across colour categories makes it impossible that a certain shape-  
266 colour combination drives an effect, as the only distinguishing feature between the abstract  
267 shapes is colour. This analysis allows us to compare whether the typicality of colour-form  
268 combinations has an effect on colour processing.

269  
270 In our final set of analyses, we examined the timecourse of shape processing. First, to assess  
271 the timecourse of shape processing independent of congruency, we trained a classifier to  
272 distinguish the five different abstract shapes in a pairwise fashion (Figure 5A). We always  
273 used one independent block of abstract shape trials to test the classifier performance (8-fold  
274 cross-validation). The results of this analysis indicate when information about different shapes  
275 are is present in the neural signal, independent of other object features (e.g., colour) or  
276 congruency. Second, we tested whether the conjunction of object and colour has an effect on  
277 object decoding (Figure 6A). If object-colour influences early perceptual processes, we might  
278 see a facilitation for decoding objects when they are coloured congruently or interference  
279 when the objects are coloured incongruently. We used the greyscale object trials to train the

280 classifier to distinguish between all of the objects. The stimulus set contained two exemplars  
281 of each item (e.g., strawberry 1 and strawberry 2). We used different exemplars for the training  
282 and testing set to minimise the effects of low-level visual features, however, given that there  
283 are major differences in object shapes and edges, we can still expect to see strong differences  
284 between the objects. The classifier was trained on one exemplar of all of the greyscale trials.  
285 We then tested the classifier's performance on the congruent and incongruent object trials  
286 using the exemplars the classifier did not train on. We then swapped the exemplars used for  
287 training and testing set until every combination had been used in the testing set. Essentially,  
288 this classifier is trained to predict which object was presented to the participant (e.g., was it a  
289 strawberry or a frog?) and we are testing whether there is a difference depending on whether  
290 the object is congruently or incongruently coloured.

291

### 292 *Statistical Inferences*

293 In all our analyses, we used random effects Monte-Carlo cluster statistic using Threshold Free  
294 Cluster Enhancement (TFCE, Smith & Nichols, 2009) as implemented in the CoSMoMVPA  
295 toolbox to see whether the classifier could predict the condition of interest above chance. The  
296 TFCE statistic represents the support from neighbouring time points, thus allowing for  
297 detection of sharp peaks and sustained small effects over time. We used a permutation test,  
298 swapping labels of complete trials, and re-ran the decoding analysis on the data with the  
299 shuffled labels 100 times per participant to create subject-level null-distributions. We then  
300 used Monte-Carlo sampling to create a group-level null-distribution consisting of 10,000  
301 shuffled label permutations for the time-resolved decoding, and 1000 for the time-  
302 generalisation analyses (to reduce computation time). The null distributions were then  
303 transformed into TFCE statistics. To correct for multiple comparisons, the *maximum* TFCE  
304 values across time in each of the null distributions was selected. We then transformed the true  
305 decoding values to TFCE statistics. To assess whether the true TFCE value at each timepoint  
306 is significantly above chance, we compared it to the 95<sup>th</sup> percentile of the corrected null  
307 distribution. Selecting the maximum TFCE value provides a conservative threshold for  
308 determining whether the observed decoding accuracy is above chance, corrected for multiple  
309 comparisons.

310

311 To assess at which timepoint the decoding accuracy peaks, we bootstrapped the participants'  
312 decoding accuracies for each analysis 10,000 times and generated 95% confidence intervals  
313 for peak decoding. For the analyses in which we are comparing colour and exemplar decoding  
314 for congruent and incongruent trials, we also compared the above chance decoding durations.



315 To test for the duration of above chance decoding, we bootstrapped the data (10,000 times)  
316 and ran our statistics. At each iteration we then looked for the longest period in which we have  
317 above chance decoding in consecutive timepoints. We plotted the bootstrapped decoding  
318 durations and calculated medians to compare the distributions for the congruent and the  
319 incongruent condition.

320

321

322

## Results

323

### Behavioural results

324

325

326

327

328

329

330

331

332

333

334

335

336

337

338

339

340

341

342

343

344

345

346

347

348

349

### MEG results

In the main task, participants were asked to indicate every 80 trials whether they had seen a certain target object or not. The aim of this task was to keep participants motivated and attentive throughout the training session. On average, participants reported whether the targets were present or absent with 90% accuracy (SD = 5%, range: 81.25% - 100%).

350 The aim of our decoding analyses was to examine the interaction between object-colour  
351 knowledge and object representations. First, we tested for a difference in the brain activation  
352 pattern for congruently and incongruently coloured objects. The results show distinct patterns  
353 of neural activity for congruent compared to incongruent objects in a cluster of consecutive  
354 timepoints stretching from 250 to 325ms after stimulus onset, demonstrating that brain activity  
355 is modulated by colour congruency in this time window (Figure 2B). Thus, binding of colour  
356 and form must have occurred by ~250ms and stored object-colour knowledge is integrated  
357 with incoming information. An exploratory searchlight (Carlson et al., 2019; Collins et al., 2018;  
358 Kaiser et al., 2016) across small clusters (9 at a time) of MEG sensors suggests that this effect  
359 is driven a range of frontal, temporal and parietal sensor clusters (Figure 2C).  
360

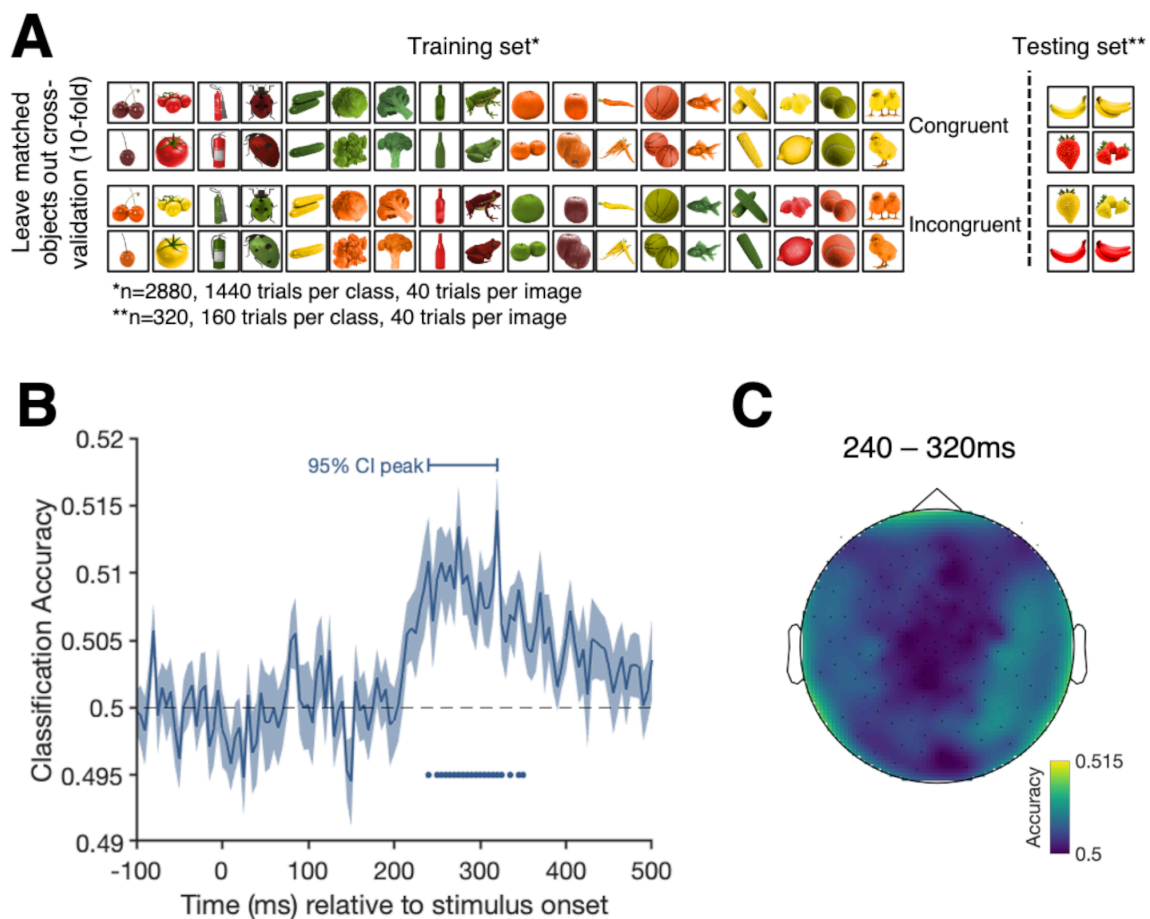

361 Figure 2. Cross-validation and results of the congruency analysis contrasting trials from the  
362 congruent and incongruent conditions. (A) shows the leave-one-matched-exemplar-out cross  
363 validation approach for a single fold for the congruency decoding analysis. The classifier was  
364 trained on the trials shown on the left and tested on the trials on the right, ensuring that the  
365 classifier is not tested on the exemplars that it trained on. This limits the effect features other  
366 than congruency can have on classifier performance. (B) shows the classification accuracy  
367 over time. Shading represents the standard error across participants. Black dashed line  
368 represents chance level (50% - congruent versus incongruent). Filled dots highlight significant  
369 timepoints, corrected for multiple comparisons. The horizontal bar above the curve shows the  
370

371 95% confidence interval of the peak. (C) is an exploratory sensor searchlight analysis in which  
372 we run the same analysis across small clusters of sensors. The colours highlight the decoding  
373 accuracy for each sensor cluster averaged over the 95% confidence interval of the peak  
374 timepoints.

375

376

377 To examine the timecourse of colour processing separately from congruency, we decoded the  
378 surface colours of the abstract shapes (Figure 3A). Consistent with earlier results (Teichmann  
379 et al., 2019), we found that colour can be decoded above chance from the abstract shape  
380 trials in a cluster stretching from 70 to 350ms (Figure 3B). Looking at data from an exploratory  
381 sensor searchlight analysis across small clusters of sensors shows that colour information at  
382 peak decoding is mainly distinguishable from occipital and parietal sensors. To examine  
383 whether all colours could be dissociated equally well, we also looked at confusion matrices  
384 displaying how frequently each colour category was predicted for each colour (Figure 3D).  
385 The results show that at the decoding peak (140ms), red and green are most easily  
386 distinguishable and that the prediction errors are not equally distributed: Red trials are more  
387 frequently misclassified as being orange than green or yellow and green trials are more  
388 frequently misclassified as being yellow than orange or red. This indicates that colours that  
389 are more similar evoke a more similar pattern of activation than colours that are dissimilar  
390 (Figure 3E).

391

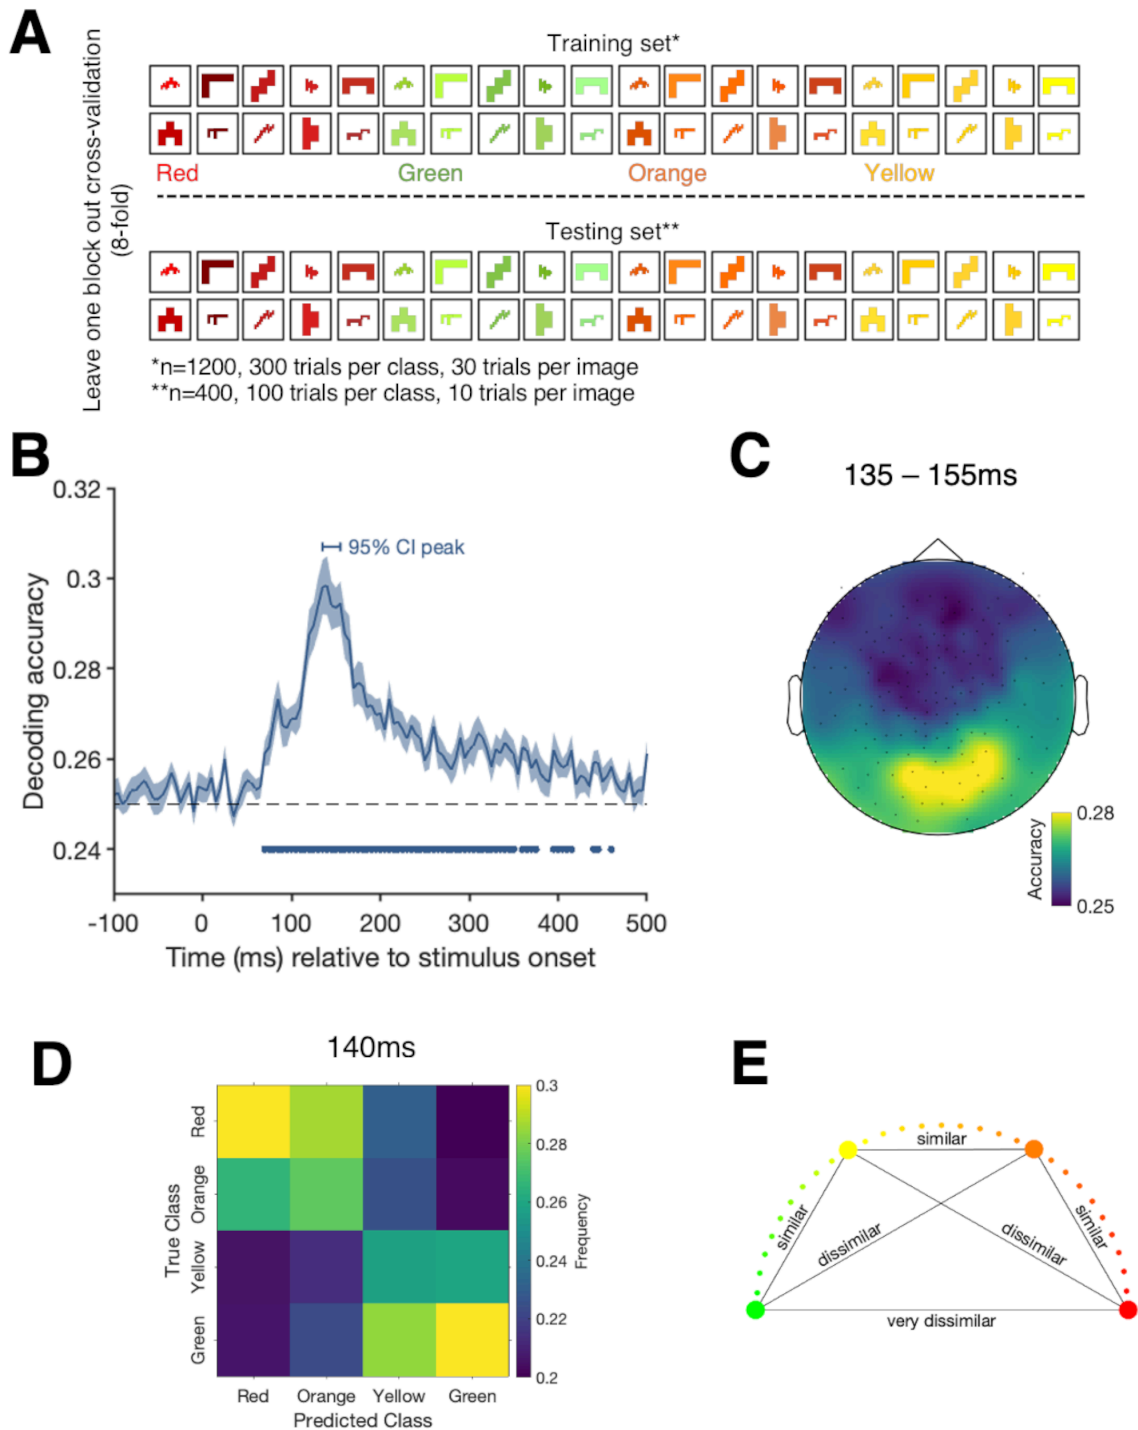

392

393 Figure 3. (A) depicts the colour decoding analysis when training the classifier to distinguish  
 394 between the different colour categories of the abstract shapes and testing on a block of  
 395 independent abstract shape trials. (B) shows the decoding accuracy for the colour decoding  
 396 analysis over time. Shading represents the standard error across participants. Black dashed  
 397 line represents chance level (25% - red versus green versus orange versus yellow). Filled dots  
 398 highlight significant timepoints, corrected for multiple comparisons. The horizontal bar above  
 399 the curve shows the 95% confidence interval of the peak. (C) shows the results of a  
 400 exploratory searchlight analysis over small sensor clusters averaged across the timepoints of  
 401 the 95% confidence interval for peak decoding. Colours indicate the decoding accuracies at  
 402 each sensor. (D) depicts a confusion matrix for peak decoding (140ms) showing the

403 frequencies at which colour categories were predicted given the true class. (E) shows the  
404 similarity of the colour categories which might underlie the results in (D).

405

406

407 To assess whether congruency influences colour processing, we trained a classifier to  
408 distinguish between the colours in the abstract shape condition and then tested it on the  
409 congruent and incongruent trials separately (Figure 4A). Colour can be successfully classified  
410 in a cluster stretching from 75 to 125ms for the congruent condition and in a cluster stretching  
411 from 75 to 185ms for the incongruent trials (Figure 4B). These results suggest there may be  
412 a difference in the way colour information is processed depending on the congruency of the  
413 image, specifically evident in the decoding peaks and decoding duration. To test whether there  
414 is a true difference in decoding timecourses, we bootstrapped the data and looked at the peak  
415 decoding and the longest consecutive streak of above chance decoding. Comparing the peak  
416 decoding times for the congruent and the incongruent condition, we find that they are different  
417 from each other (Figure 4C, top). However, comparing the confidence intervals of the  
418 decoding durations we find no consistent differences between the congruent and the  
419 incongruent condition (Figure 4C, bottom). This could be due to the fact that on- and offsets  
420 in above chance decoding are affected by signal strength and thresholds (cf. Grootswagers  
421 et al., 2017). The peak differences are a more robust measure and suggest that colour  
422 stronger colour decoding occurs later in the incongruent compared to congruent condition. To  
423 get a complete picture of how these signals evolve over time, we used time-generalisation  
424 matrices (Figure 4D and 4E). To create time-generalisation matrices, we trained the classifier  
425 on each timepoint of the training dataset and then tested it on all timepoints of the test set.  
426 The diagonal of these matrices corresponds to the standard time-resolved decoding results  
427 (e.g., training at 100ms and testing at 100ms). A decodable off-the-diagonal effect reflects a  
428 temporal asynchrony in information processing in the training and testing set (cf. Carlson et  
429 al., 2011; King & Dehaene, 2014). Our data show that colour category was decodable from  
430 both conditions early on (~70ms). In the incongruent condition, the activation associated with  
431 colour seems to be sustained longer (Figure 4E) than for the congruent condition (Figure 4D),  
432 but for both, decoding above chance occurs mainly along the diagonal. This suggests that the  
433 initial pattern of activation for colour signals occurs at the same time but that the signals  
434 associated with colour are prolonged when object-colour combinations are unusual relative to  
435 when they are typical.

436

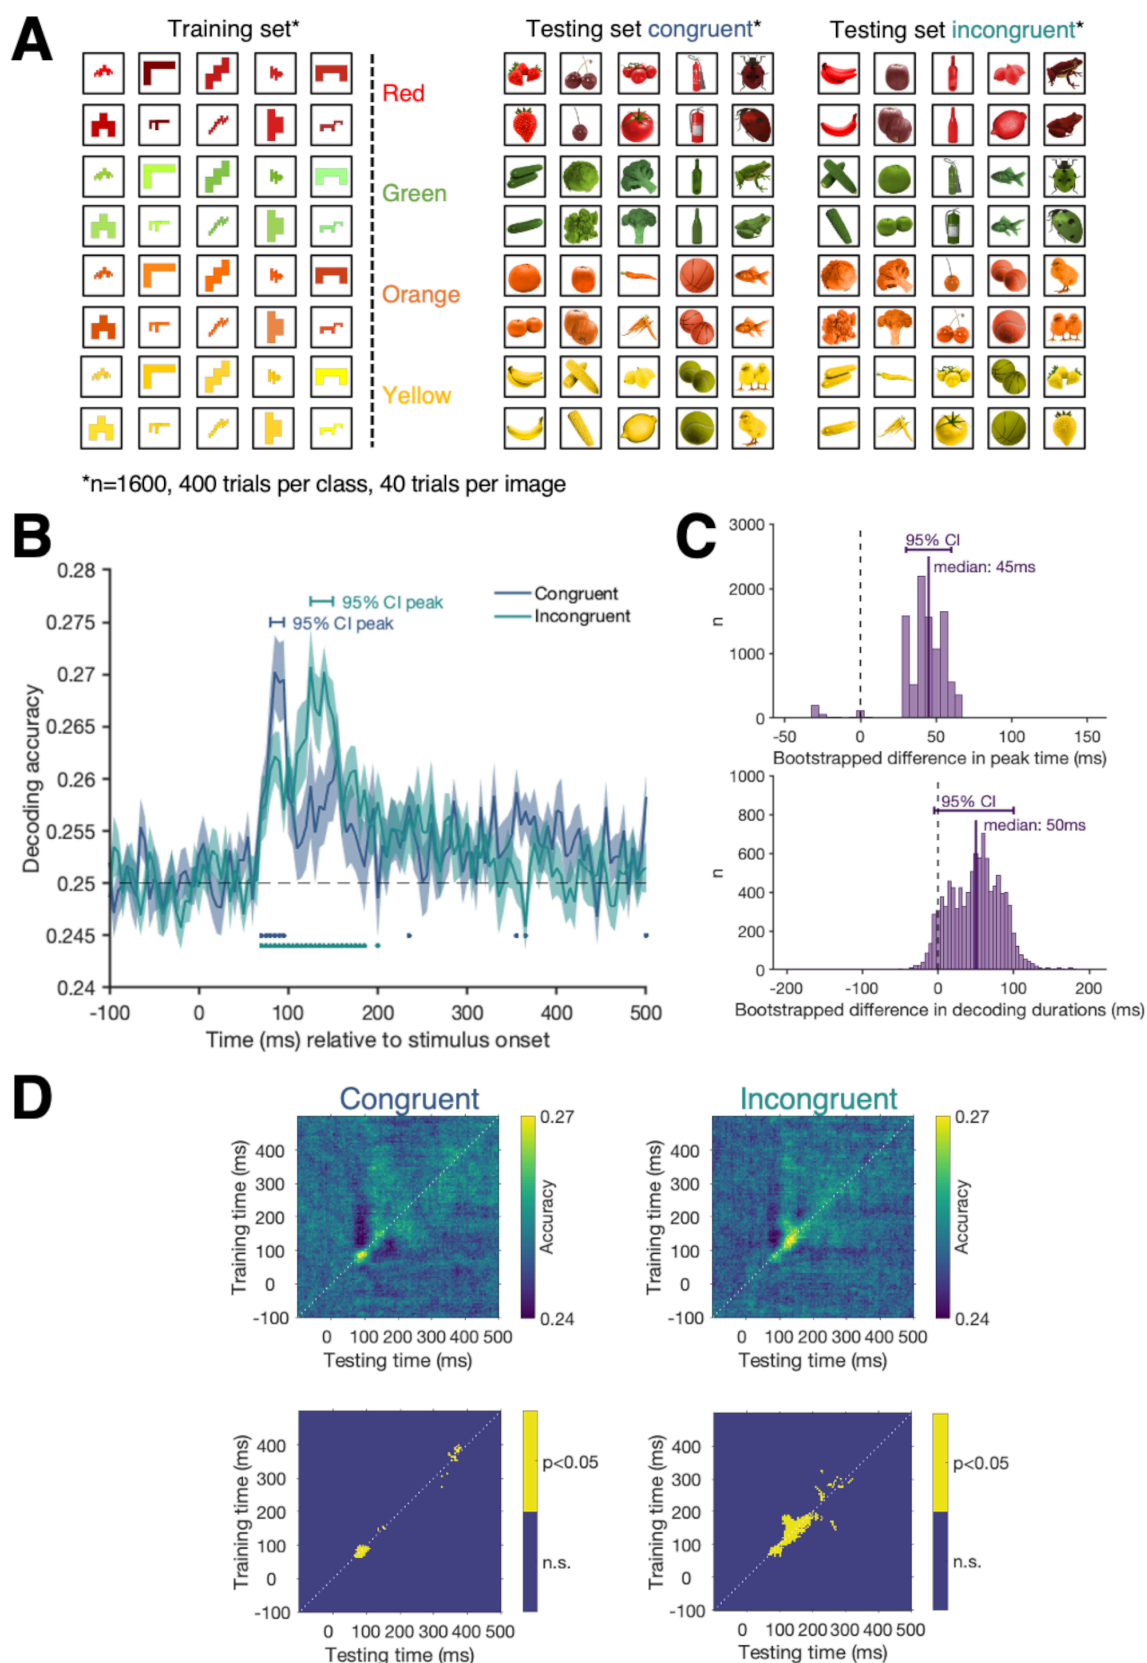

437  
438  
439  
440  
441

Figure 4. Results of the colour decoding analysis for the congruent and incongruent trials. Here, the classifier was trained to distinguish the colour of all abstract shape trials and tested on the congruent and incongruent trials separately (A). (B) shows the classification accuracy over time for the congruent (blue) and incongruent (green) trials. Shading represents the



442 standard error across participants. Black dashed line indicates chance level (25% - red versus  
443 green versus orange versus yellow). Blue (congruent) and green (incongruent) dots highlight  
444 timepoints at which we can decode the surface colour significantly above chance, corrected  
445 for multiple comparisons. (C) shows the bootstrapped differences in peak time (top) and the  
446 bootstrapped differences in decoding duration (bottom) for the congruent and the incongruent  
447 conditions. (D) shows the results of the same analysis across all possible training and testing  
448 timepoint combinations. These time-time matrices allow us to examine how the signal for the  
449 congruent colours (left) and incongruent colours (right) evolves over time. The top row shows  
450 the classification accuracy at every timepoint combination with lighter pixels reflecting higher  
451 decoding accuracies. The bottom row shows clusters where decoding is significantly above  
452 chance (yellow), corrected for multiple comparisons.

453

454

455 In an exploratory colour analysis, we also examined which errors the classifier made when  
456 predicting the colour of the incongruently coloured objects. We looked at whether the implied  
457 object colour is predicted more often than the surface colour or the other colours. However,  
458 as errors were not equally distributed across the incorrect labels in the training (abstract  
459 shape) dataset, we need to compare the misclassification results for the incongruent condition  
460 to the results from the congruent condition, to take these differing base rates into account. For  
461 each object in the incongruent condition (e.g., yellow strawberry), we have a colour-matched  
462 object in the congruent condition (e.g., yellow banana). We made use of these matched stimuli  
463 by looking at misclassifications and checking how frequently the implied colour of an  
464 incongruent object (e.g., red for a yellow strawberry) was predicted in comparison to the  
465 matched congruent object (e.g., red for a yellow banana). If the implied colour of incongruently  
466 coloured objects was activated along with the surface colour, we should see a higher rate of  
467 implied colour predictions (e.g., red) for the incongruent object (e.g., yellow strawberry) than  
468 for the colour-matched congruent object (e.g., yellow banana).

469 The results (Figure 5) do not show this pattern: at the first peak (~80-110ms), the “other”  
470 colours are actually more likely to be chosen by the classifier than the implied colour, for both  
471 the congruent and incongruent condition. A possible explanation for not seeing an effect of  
472 implied colour in the colour decoding analysis is that the decoding model is based on the  
473 actual colour pattern, whereas the timing and mechanisms of implied colour activation may be  
474 different (Teichmann et al., 2019).

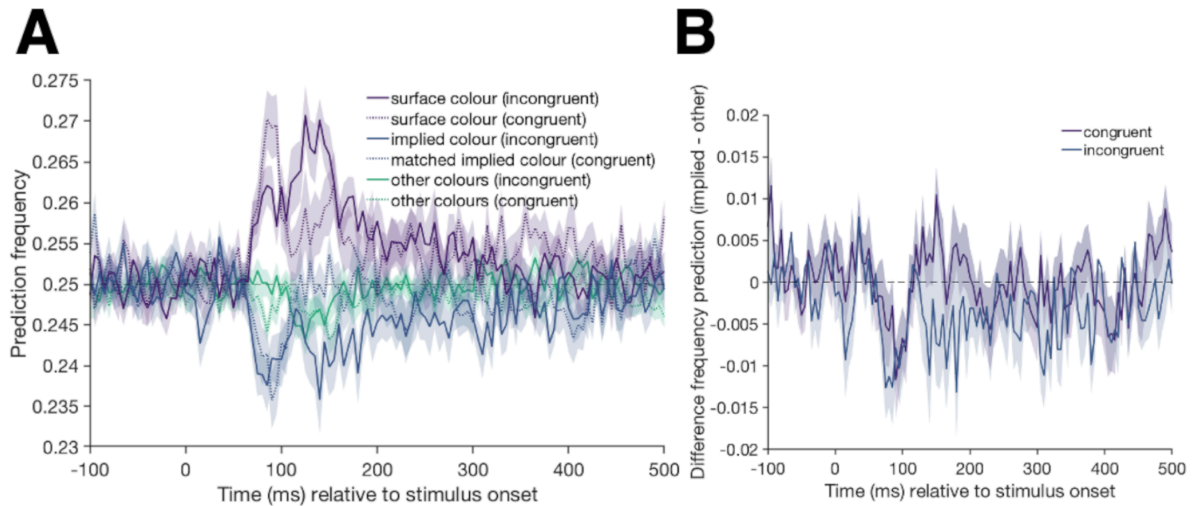

475  
476 Figure 5. (A) shows the frequency of a predicted class when the classifier is trained on  
477 distinguishing colours in the abstract shape condition and tested on trials from the congruent  
478 (dotted lines) and incongruent (full lines) conditions. Shading represents the standard error  
479 across participants. There are clear peaks for the correct prediction of the surface colour  
480 between 100 and 150ms (purple lines). In cases where the classifier makes an error, there is  
481 no evidence that the classifier picks the implied object colour (blue lines) more frequently than  
482 the other incorrect colours (green lines). Note that the classifier is trained on the abstract  
483 shape condition which has an uneven colour similarity, the errors in the incongruent condition  
484 have to be interpreted in relation to how often the matched implied colour in the congruent  
485 condition is predicted. (B) shows the difference of the classifier predicting the implied over the  
486 other colours for the congruent (purple) and incongruent (blue) conditions.

487

488

489

490 The goal of the third analysis was to examine whether shape representations are affected by  
491 colour congruency. It could be the case, for example, that the representation of banana-  
492 shapes compared to strawberry-shapes is enhanced when their colours are correct. First, we  
493 tested when shape representations can be decoded independent of colour congruency. We  
494 trained the classifier to distinguish between the five different abstract shapes in a pairwise  
495 fashion and then tested its performance on independent data (Figure 6A). The data show that  
496 shape information can be decoded in a cluster stretching from 60 to 500ms (Figure 6B).  
497 Running an exploratory searchlight analysis on small clusters of sensors (9 at a time) shows  
498 that shape information at peak decoding is mainly driven by occipital sensors (Figure 6C).

499



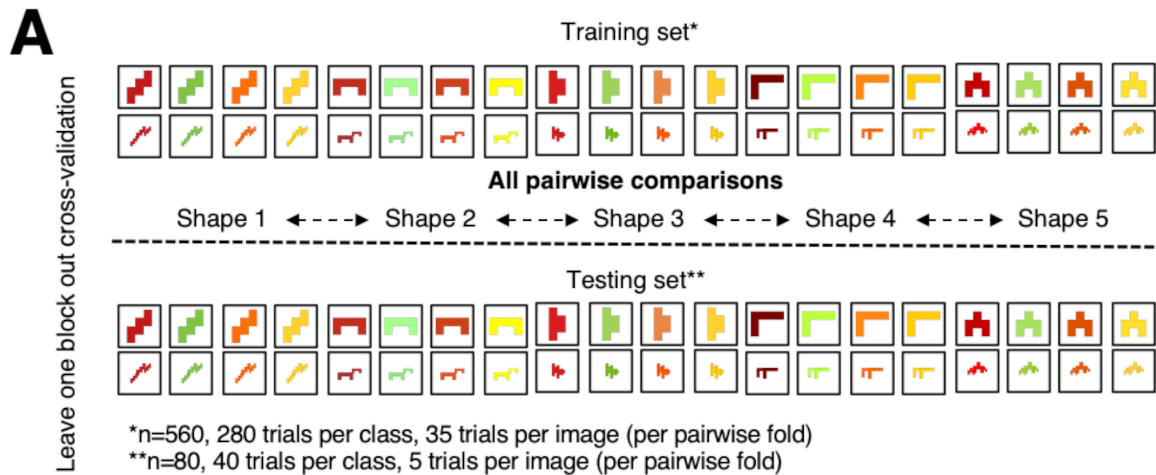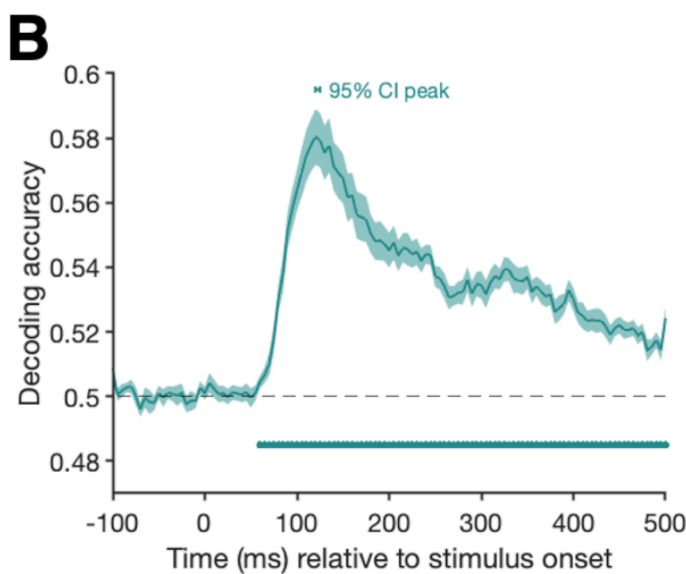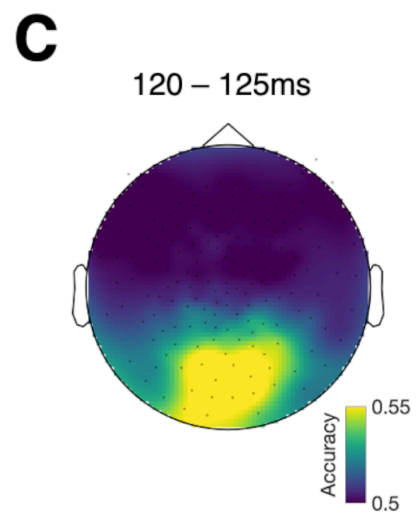

500  
 501 Figure 6. (A) depicts the shape decoding analysis when training the classifier to distinguish  
 502 between the different categories of the abstract shapes and testing on a block of independent  
 503 abstract shape trials. (B) shows the decoding accuracy for the shape decoding analysis over  
 504 time. Shading represents the standard error across participants. Black dashed line represents  
 505 chance level (50% - pairwise comparison of all shapes). Filled dots highlight significant  
 506 timepoints, corrected for multiple comparisons. The horizontal bar above the curve shows the  
 507 95% confidence interval of the peak. (C) shows the results of an exploratory searchlight  
 508 analysis over small sensor clusters averaged across the timepoints of the 95% confidence  
 509 interval for peak decoding. Colours indicate the decoding accuracies at each sensor.

510

511

512 To examine whether colour affects object processing, we trained a classifier to distinguish  
 513 between trials in which the participant saw one of the exemplars of each of the twenty objects  
 514 in greyscale (e.g., greyscale strawberry 1, greyscale cherry 1, etc.). We then tested at which  
 515 timepoint the classifier could successfully cross-generalise to the other exemplar of that object  
 516 in the congruent and incongruent condition separately (Figure 7A). If object representations  
 517 (e.g., banana) are influenced by the typicality of their colours, then cross-generalisation should

518 be different for congruent and incongruent trials. Note that although the exact images are  
 519 unique, there are shared shape characteristics between exemplars (e.g., the two frog  
 520 exemplars share some shape aspects despite being different postures), which can be  
 521 expected to drive an effect. The results show the neural data has differential information about  
 522 the object in a cluster stretching from 65 to 500ms for both the congruent and the incongruent  
 523 test sets (Figure 7B). These results show that we can decode the object class early on, at a  
 524 similar time to when we can decode the abstract shape conditions, suggesting that the  
 525 classifier here is driven strongly by low-level features (like shape), rather than being influenced  
 526 by colour congruency. The timecourse for congruent and incongruent object decoding is very  
 527 similar in terms of peak decoding and decoding duration (Figure 7C). Thus, our data suggest  
 528 that there is no effect of colour congruency on object processing.  
 529

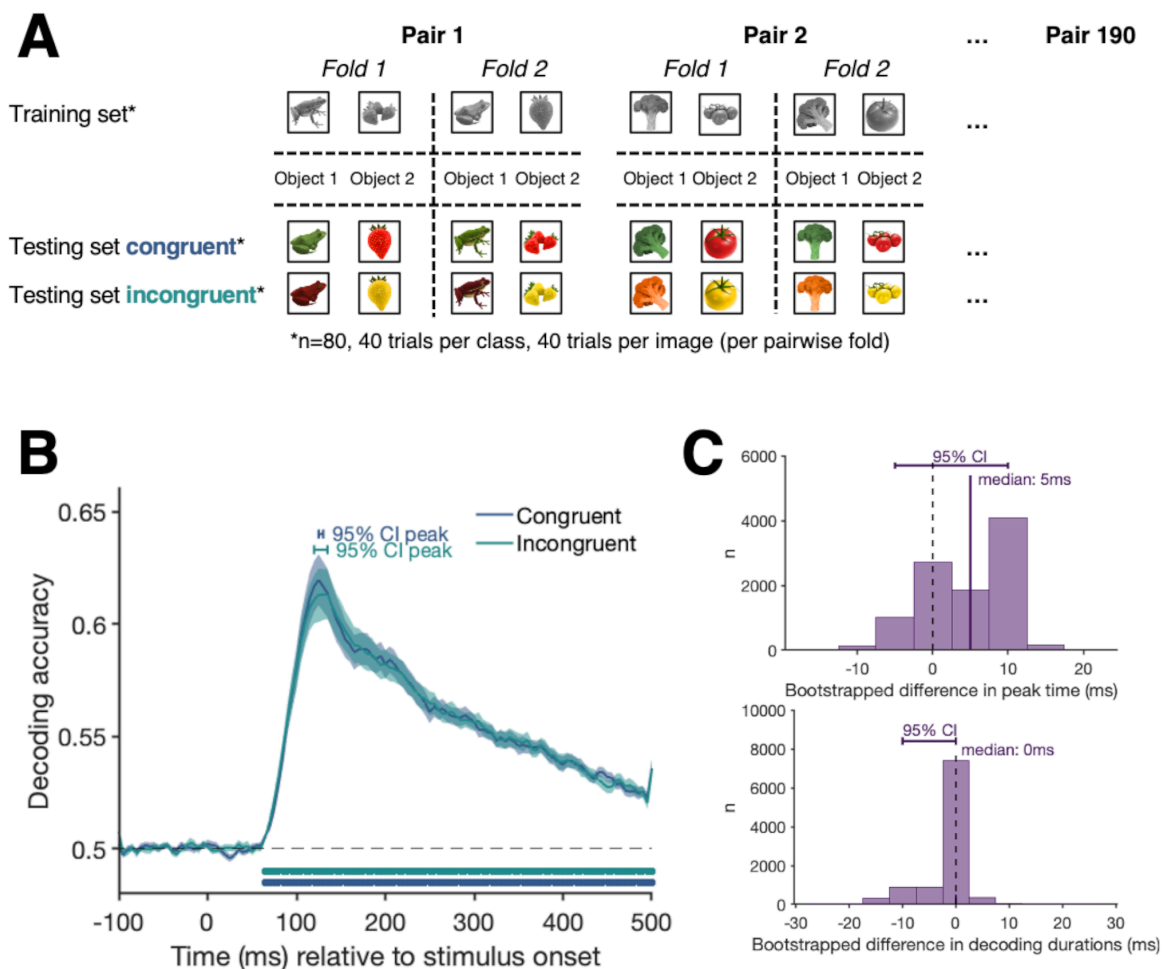

530

531 Figure 7. Results of the object exemplar decoding analysis. The classifier was trained to  
 532 distinguish between all pairwise object categories in the greyscale object condition. We used  
 533 one exemplar of each class for the training and the other exemplar for testing the classifier.  
 534 Testing was done for the congruent and incongruent trials separately (A). (B) shows the  
 535 classification accuracy over time for the object decoding analysis when testing the classifier's

536 performance on congruent (blue) and incongruent (green) trials. Shading represents the  
537 standard error across participants. Black dashed line represents chance level (50% - pairwise  
538 decoding for all 20 different object categories). Blue (congruent) and green (incongruent) dots  
539 highlight significant timepoints ( $p < 0.05$ ), corrected for multiple comparisons. (C) shows the  
540 bootstrapped differences in peak time (top) and the bootstrapped differences in decoding  
541 duration (bottom) for the congruent and the incongruent conditions.  
542

543

544 Overall, the results here show that single features present within the incoming visual stimuli  
545 are decodable earlier than the congruency between them, which can be seen as an index for  
546 accessing stored conceptual knowledge (Figure 8). When we compare colour and shape  
547 decoding for abstract shapes and for congruently and incongruently coloured objects, the  
548 decoding onsets are very similar, suggesting the initial processes of single feature processing  
549 are not influenced by congruency. However, peak colour decoding occurs later for  
550 incongruently coloured in comparison to congruently coloured objects suggesting that colour  
551 congruency influences colour processing to some degree.

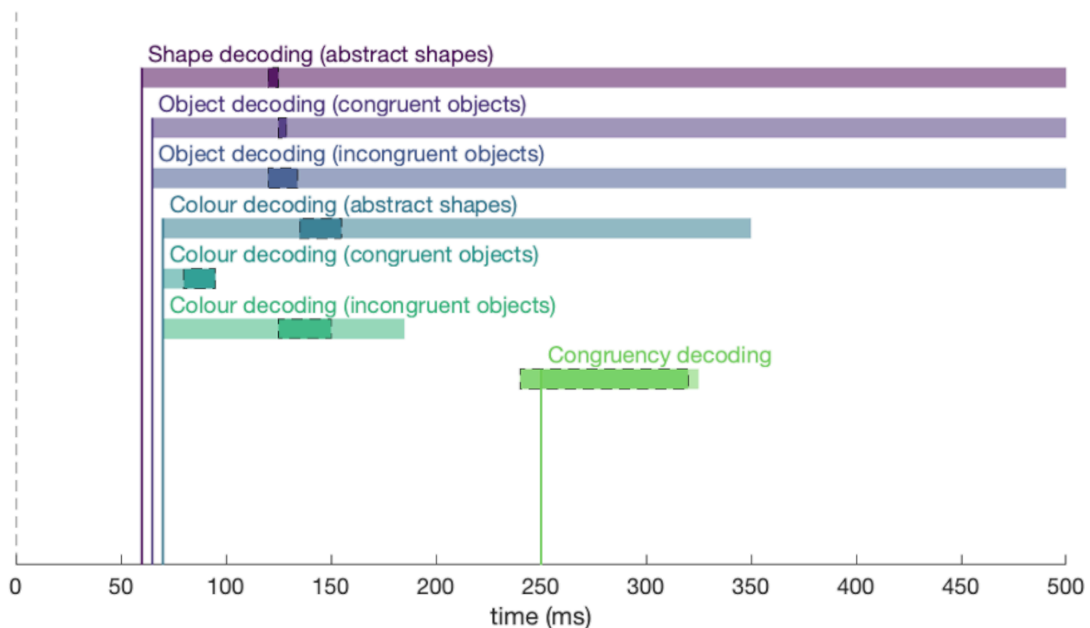

552

553 Figure 8. Overview of the findings. Each coloured bar shows the the onset (x axis) and duration  
554 (length of coloured bar) at which feature and conjunction information was contained in the  
555 neural signal. Darker shadings surrounded by dotted black lines show the bootstrapped 95%  
556 confidence interval for peak decoding. The dotted vertical line represents stimulus onset.  
557

558

559

## Discussion

560

561 A crucial question in object recognition concerns how incoming visual information interacts  
with stored object concepts to create meaningful vision under varying situations. The aims of

562 the current study were to examine the temporal dynamics of object-colour knowledge and to  
563 test whether activating object-colour knowledge influences the early stages of colour and  
564 object processing. Our data provide three major insights: First, congruently and incongruently  
565 coloured objects evoke a different neural representation after ~250ms suggesting that, by this  
566 time, visual object features are bound into a coherent representation and compared to stored  
567 object representations. Second, colour can be decoded at a similar latency (~70ms)  
568 irrespective of whether participants view coloured abstract shapes, or congruently and  
569 incongruently coloured objects. However, peak decoding occurs later when viewing  
570 incongruently coloured objects compared to congruent ones. Third, we do not find an influence  
571 of colour congruency on object processing, which may suggest that behavioural congruency  
572 effects are due to conflict at a later stage in processing.

573  
574 Colour congruency can act as an index to assess when prior knowledge is integrated with  
575 bound object features. When comparing brain activation patterns of the same objects  
576 presented in different colours, there was a decodable difference between congruent and  
577 incongruent conditions from ~250ms onwards suggesting a stored object representation that  
578 contains information about the typical colour of an object must have been activated by this  
579 stage. Prior to this time, the signal is primarily driven by processing of early perceptual features  
580 such as colour and shape, which were matched for the congruent and incongruent conditions  
581 (same objects, same colours, only the combination of colour and shape differed). Although  
582 from our data we cannot draw direct conclusions about which brain areas are involved in the  
583 integration of incoming visual information and stored object knowledge, our congruency  
584 analysis adds to the fMRI literature by showing the relative timecourse at which a meaningful  
585 object representation emerges. Activating object-colour knowledge from memory has been  
586 shown to involve the ATL (e.g., Coutanche & Thompson-Schill, 2014) and there is evidence  
587 that object-colour congruency coding occurs in perirhinal cortex (Price et al., 2017). Further  
588 support on the involvement of the ATL in the integration of incoming sensory information and  
589 stored representations comes from work on patients with semantic dementia (e.g., Bozeat et  
590 al., 2002) and studies on healthy participants using TMS (e.g., Chiou et al., 2014). Higher level  
591 brain areas in the temporal lobe have also been shown to be part of neuronal circuits involved  
592 in implicit imagery, supporting visual perception by augmenting incoming information with  
593 stored conceptual knowledge (e.g., Albright, 2012; Miyashita, 2004). The latency of  
594 congruency decoding here may thus reflect the time it takes to compare visual object  
595 representations with conceptual templates in higher-level brain areas such as the ATL, or the

596 time it takes for feedback or error signals about colour congruency to arrive back in early visual  
597 areas.

598

599 Our results also show that colour congruency has an effect on colour processing. We found  
600 colour decoding onset at a similar time (~70ms) for abstract shapes and congruently and  
601 incongruently coloured objects. This indicates that colour signals are activated initially  
602 independently of object shape, consistent with previous work showing that single features are  
603 processed first and that the conjunction of colour and shape occurs at a later stage (e.g.,  
604 Seymour et al., 2015). However, we also found differences between colour processing in  
605 congruent and incongruent conditions: The colour signal peaked later in the incongruent  
606 relative to the congruent condition, suggesting that congruency influences the timecourse of  
607 colour processing to some degree. Our time-generalisation analysis (Figure 4D) supports this  
608 by showing that there is a different dynamic for congruent and incongruent trials. One possible  
609 explanation for this finding is that unusual feature pairings (e.g., shape and colour or texture  
610 and colour) might lead to local feedback signals that prolong colour processing. Alternatively,  
611 consistent with the memory colour literature (e.g., Hansen et al., 2006; Olkkonen et al., 2008;  
612 Witzel et al., 2011), it is possible that typical colours are co-activated along with other low-  
613 level features. For incongruent trials, this would then lead to two potential colours needing to  
614 be distinguished, extending the timeframe for processing and delaying the peak activation for  
615 the surface colour of the object.

616

617 The timecourse of exemplar decoding we present is consistent with previous studies on object  
618 recognition. Here, we found that exemplar identity could be decoded at ~65ms. Similar  
619 latencies have been found in other M/EEG decoding studies (Carlson et al., 2013; Cichy et  
620 al., 2014; Contini et al., 2017; Grootswagers et al., 2019; Isik et al., 2013) and single unit  
621 recordings (e.g., Hung, Kreiman, Poggio, & DiCarlo, 2005). Behavioural data, including the  
622 reaction times collected from our participants, show that colour influences object identification  
623 speed (e.g., Bramão, Faisca, Petersson, & Reis, 2010). The neural data, however, did not  
624 show an effect of object colour on the classifier's performance when distinguishing the neural  
625 activation patterns evoked by different object exemplars. For example, the brain activation  
626 pattern in response to a strawberry could be differentiated from the pattern evoked by a lemon,  
627 regardless of the congruency of their colours. This finding is consistent with previous results  
628 (Proverbio et al., 2004) but might seem puzzling because colour congruency has been shown  
629 to have a strong effect on object naming (e.g., Chiou et al., 2014; Nagai & Yokosawa, 2003;  
630 Tanaka & Presnell, 1999). One plausible possibility is that the source of behavioural

631 congruency effects may be at the stage of response selection, which would not show up in  
632 these early neural signals. More evidence is needed, but there is no evidence in the current  
633 data to suggest colour congruency influences early stages of object processing.

634

635 Our data demonstrate that object representations are influenced by object-colour knowledge  
636 but not at the initial stages of visual processes. Consistent with a traditional hierarchical view,  
637 we show that visual object features are processed before the features are bound into a  
638 coherent object that can be compared with existing, conceptual object representations.  
639 However, our data also suggest that the temporal dynamics of colour processing are  
640 influenced by the typicality of object-colour pairings. Building on the extensive literature on  
641 visual perception, these results provide a timecourse for the integration of incoming visual  
642 information with stored knowledge, a process that is critical for interpreting the visual world  
643 around us.



## References

- Albright, T. D. (2012). On the perception of probable things: Neural substrates of associative memory, imagery, and perception. *Neuron*, *74*(2), 227–245.
- Bannert, M. M., & Bartels, A. (2013). Decoding the yellow of a gray banana. *Current Biology*, *23*(22), 2268–2272.
- Bozeat, S., Lambon Ralph, M. A., Patterson, K., & Hodges, J. R. (2002). When objects lose their meaning: What happens to their use? *Cognitive, Affective, & Behavioral Neuroscience*, *2*(3), 236–251.
- Brainard, D. H. (1997). The psychophysics toolbox. *Spatial Vision*, *10*, 433–436.
- Brainard, D. H., & Pelli, D. G. (1997). The psychophysics toolbox. *Spatial Vision*, *10*, 433–436.
- Bramão, I., Faísca, L., Petersson, K. M., & Reis, A. (2010). The influence of surface color information and color knowledge information in object recognition. *The American Journal of Psychology*, *123*(4), 437–446.
- Carlson, T. A., Grootswagers, T., & Robinson, A. K. (2019). An introduction to time-resolved decoding analysis for M/EEG. *ArXiv Preprint ArXiv:1905.04820*.
- Carlson, T. A., Hogendoorn, H., Kanai, R., Mesik, J., & Turret, J. (2011). High temporal resolution decoding of object position and category. *Journal of Vision*, *11*(10), 9–9.
- Carlson, T. A., Tovar, D. A., Alink, A., & Kriegeskorte, N. (2013). Representational dynamics of object vision: The first 1000 ms. *Journal of Vision*, *13*(10), 1–1.
- Chiou, R., Sowman, P. F., Etchell, A. C., & Rich, A. N. (2014). A conceptual lemon: Theta burst stimulation to the left anterior temporal lobe untangles object representation and its canonical color. *Journal of Cognitive Neuroscience*, *26*(5), 1066–1074.
- Cichy, R. M., Pantazis, D., & Oliva, A. (2014). Resolving human object recognition in space and time. *Nature Neuroscience*, *17*(3), 455.
- Clarke, A., & Tyler, L. K. (2015). Understanding what we see: How we derive meaning from vision. *Trends in Cognitive Sciences*, *19*(11), 677–687.
- Collins, E., Robinson, A. K., & Behrmann, M. (2018). Distinct neural processes for the perception of familiar versus unfamiliar faces along the visual hierarchy revealed by EEG. *NeuroImage*, *181*, 120–131.
- Contini, E. W., Wardle, S. G., & Carlson, T. A. (2017). Decoding the time-course of object recognition in the human brain: From visual features to categorical decisions. *Neuropsychologia*. <https://doi.org/10.1016/j.neuropsychologia.2017.02.013>
- Conway, B. R. (2018). The organization and operation of inferior temporal cortex. *Annual Review of Vision Science*, *4*, 381–402.
- Coutanche, M. N., & Thompson-Schill, S. L. (2014). Creating concepts from converging features in human cortex. *Cerebral Cortex*, *25*(9), 2584–2593.
- Gegenfurtner, K. R., & Rieger, J. (2000). Sensory and cognitive contributions of color to the recognition of natural scenes. *Current Biology*, *10*(13), 805–808. [https://doi.org/10.1016/S0960-9822\(00\)00563-7](https://doi.org/10.1016/S0960-9822(00)00563-7)
- Grootswagers, T., Robinson, A. K., & Carlson, T. A. (2019). The representational dynamics of visual objects in rapid serial visual processing streams. *NeuroImage*, *188*, 668–679.

- Groetswagers, T., Wardle, S. G., & Carlson, T. A. (2017). Decoding Dynamic Brain Patterns from Evoked Responses: A Tutorial on Multivariate Pattern Analysis Applied to Time Series Neuroimaging Data. *Journal of Cognitive Neuroscience*, *29*(4), 677–697. [https://doi.org/10.1162/jocn\\_a\\_01068](https://doi.org/10.1162/jocn_a_01068)
- Hansen, T., Olkkonen, M., Walter, S., & Gegenfurtner, K. R. (2006). Memory modulates color appearance. *Nature Neuroscience*, *9*(11), 1367.
- Hebart, M. N., & Baker, C. I. (2018). Deconstructing multivariate decoding for the study of brain function. *Neuroimage*, *180*, 4–18.
- Hung, C. P., Kreiman, G., Poggio, T., & DiCarlo, J. J. (2005). Fast readout of object identity from macaque inferior temporal cortex. *Science*, *310*(5749), 863–866.
- Isik, L., Meyers, E. M., Leibo, J. Z., & Poggio, T. (2013). The dynamics of invariant object recognition in the human visual system. *Journal of Neurophysiology*, *111*(1), 91–102. <https://doi.org/10.1152/jn.00394.2013>
- Joseph, J. E. (1997). Color processing in object verification. *Acta Psychologica*, *97*(1), 95–127.
- Kaiser, D., Oosterhof, N. N., & Peelen, M. V. (2016). The neural dynamics of attentional selection in natural scenes. *Journal of Neuroscience*, *36*(41), 10522–10528.
- King, J. R., & Dehaene, S. (2014). Characterizing the dynamics of mental representations: The temporal generalization method. *Trends in Cognitive Sciences*, *18*(4), 203–210. <https://doi.org/10.1016/j.tics.2014.01.002>
- Kleiner, M., Brainard, D., Pelli, D., Ingling, A., Murray, R., Broussard, C., & others. (2007). What's new in Psychtoolbox-3. *Perception*, *36*(14), 1.
- Lafer-Sousa, R., & Conway, B. R. (2013). Parallel, multi-stage processing of colors, faces and shapes in macaque inferior temporal cortex. *Nature Neuroscience*, *16*(12), 1870.
- Lafer-Sousa, R., Conway, B. R., & Kanwisher, N. G. (2016). Color-Biased Regions of the Ventral Visual Pathway Lie between Face- and Place-Selective Regions in Humans, as in Macaques. *Journal of Neuroscience*, *36*(5), 1682–1697. <https://doi.org/10.1523/JNEUROSCI.3164-15.2016>
- Lloyd-Jones, T. J., Roberts, M. V., Leek, E. C., Fouquet, N. C., & Truchanowicz, E. G. (2012). The time course of activation of object shape and shape+ colour representations during memory retrieval. *PLoS One*, *7*(11), e48550.
- Love, J., Selker, R., Marsman, M., Jamil, T., Verhagen, A. J., Ly, A., Gronau, Q. F., Smira, M., Epskamp, S., Matzke, D., Wild, A., Rouder, J. N., Morey, R. D., & Wagenmakers, E.-J. (2015). *JASP (Version 0.6.5)*.
- Lu, A., Xu, G., Jin, H., Mo, L., Zhang, J., & Zhang, J. X. (2010). Electrophysiological evidence for effects of color knowledge in object recognition. *Neuroscience Letters*, *469*(3), 405–410.
- Maris, E., & Oostenveld, R. (2007). Nonparametric statistical testing of EEG-and MEG-data. *Journal of Neuroscience Methods*, *164*(1), 177–190.
- Miyashita, Y. (2004). Cognitive memory: Cellular and network machineries and their top-down control. *Science*, *306*(5695), 435–440.
- Nagai, J., & Yokosawa, K. (2003). What regulates the surface color effect in object recognition: Color diagnosticity or category. *Technical Report on Attention and Cognition*, *28*, 1–4.
- Naor-Raz, G., Tarr, M. J., & Kersten, D. (2003). Is color an intrinsic property of object representation? *Perception*, *32*(6), 667–680.



- Olkkonen, M., Hansen, T., & Gegenfurtner, K. R. (2008). Color appearance of familiar objects: Effects of object shape, texture, and illumination changes. *Journal of Vision*, 8(5), 13–13.
- Oostenveld, R., Fries, P., Maris, E., & Schoffelen, J.-M. (2011). FieldTrip: Open source software for advanced analysis of MEG, EEG, and invasive electrophysiological data. *Computational Intelligence and Neuroscience*, 2011, 1.
- Oosterhof, N. N., Connolly, A. C., & Haxby, J. V. (2016). CoSMoMVPA: Multi-modal multivariate pattern analysis of neuroimaging data in Matlab/GNU Octave. *Frontiers in Neuroinformatics*, 10. <https://www.ncbi.nlm.nih.gov/pmc/articles/PMC4956688/>
- Papinutto, N., Galantucci, S., Mandelli, M. L., Gesierich, B., Jovicich, J., Caverzasi, E., Henry, R. G., Seeley, W. W., Miller, B. L., Shapiro, K. A., & Gorno-Tempini, M. L. (2016). Structural connectivity of the human anterior temporal lobe: A diffusion magnetic resonance imaging study. *Human Brain Mapping*, 37(6), 2210–2222. <https://doi.org/10.1002/hbm.23167>
- Patterson, K., Nestor, P. J., & Rogers, T. T. (2007). Where do you know what you know? The representation of semantic knowledge in the human brain. *Nature Reviews Neuroscience*, 8(12), 976.
- Price, A. R., Bonner, M. F., Peelle, J. E., & Grossman, M. (2017). Neural coding of fine-grained object knowledge in perirhinal cortex. *BioRxiv*, 194829.
- Proverbio, A. M., Burco, F., del Zotto, M., & Zani, A. (2004). Blue piglets? Electrophysiological evidence for the primacy of shape over color in object recognition. *Cognitive Brain Research*, 18(3), 288–300. <https://doi.org/10.1016/j.cogbrainres.2003.10.020>
- Rosenthal, I., Ratnasingam, S., Haile, T., Eastman, S., Fuller-Deets, J., & Conway, B. R. (2018). Color statistics of objects, and color tuning of object cortex in macaque monkey. *Journal of Vision*, 18(11), 1–1.
- Seymour, K., Clifford, C. W. G., Logothetis, N. K., & Bartels, A. (2010). Coding and Binding of Color and Form in Visual Cortex. *Cerebral Cortex*, 20(8), 1946–1954. <https://doi.org/10.1093/cercor/bhp265>
- Seymour, K., Williams, M. A., & Rich, A. N. (2015). The representation of color across the human visual cortex: Distinguishing chromatic signals contributing to object form versus surface color. *Cerebral Cortex*, 26(5), 1997–2005.
- Simmons, W. K., Ramjee, V., Beauchamp, M. S., McRae, K., Martin, A., & Barsalou, L. W. (2007). A common neural substrate for perceiving and knowing about color. *Neuropsychologia*, 45(12), 2802–2810.
- Smith, S. M., & Nichols, T. E. (2009). Threshold-free cluster enhancement: Addressing problems of smoothing, threshold dependence and localisation in cluster inference. *Neuroimage*, 44(1), 83–98.
- Tanaka, J. W., & Presnell, L. M. (1999). Color diagnosticity in object recognition. *Perception & Psychophysics*, 61(6), 1140–1153. <https://doi.org/10.3758/BF03207619>
- Tanaka, J. W., Weiskopf, D., & Williams, P. (2001). The role of color in high-level vision. *Trends in Cognitive Sciences*, 5(5), 211–215. [https://doi.org/10.1016/S1364-6613\(00\)01626-0](https://doi.org/10.1016/S1364-6613(00)01626-0)
- Teichmann, L., Grootswagers, T., Carlson, T., & Rich, A. N. (2019). Seeing versus knowing: The temporal dynamics of real and implied colour processing in the human brain. *NeuroImage*, 200, 373.

- Therriault, D. J., Yaxley, R. H., & Zwaan, R. A. (2009). The role of color diagnosticity in object recognition and representation. *Cognitive Processing*, *10*(4), 335.
- Vandenbroucke, A. R., Fahrenfort, J. J., Meuwese, J. D. I., Scholte, H. S., & Lamme, V. A. F. (2014). Prior knowledge about objects determines neural color representation in human visual cortex. *Cerebral Cortex*, *26*(4), 1401–1408.
- Wagberg, J. (2007). *OptProp, Matlab toolbox for calculation of color related optical properties*.
- Willenbockel, V., Sadr, J., Fiset, D., Horne, G. O., Gosselin, F., & Tanaka, J. W. (2010). Controlling low-level image properties: The SHINE toolbox. *Behavior Research Methods*, *42*(3), 671–684.
- Witzel, C., Valkova, H., Hansen, T., & Gegenfurtner, K. R. (2011). Object knowledge modulates colour appearance. *I-Perception*, *2*(1), 13–49.
- Zeki, S., & Marini, L. (1998). Three cortical stages of colour processing in the human brain. *Brain: A Journal of Neurology*, *121*(9), 1669–1685.
